# Supplementary material for: Clinical standards for the diagnosis and management of asthma in low- and middle-income countries
Source: PubMed Central journal article supplement (PMC10443788; doi:10.5588/ijtld.23.0203), 2023-09-01
Supplement: iutld_ijtld_23.0203_supplementarydata1.pdf [file iutld_ijtld_23.0203_supplementarydata1.pdf]

## Clinical standards for the diagnosis and management of asthma in low- and middle-income countries

**Supplementary Table S1.** Low- and middle-income countries represented in the Delphi process.

| No. of Participants | WHO Region            | Country              | Income Group        |
|---------------------|-----------------------|----------------------|---------------------|
| 1                   | Africa                | Ethiopia             | Low income          |
| 1                   | Africa                | The Gambia           | Low income          |
| 1                   | Africa                | Mozambique           | Low income          |
| 1                   | Africa                | Uganda               | Low income          |
| 2                   | Africa                | Zambia               | Lower middle income |
| 1                   | Africa                | Zimbabwe             | Lower middle income |
| 2                   | Africa                | Cameroon             | Lower middle income |
| 6                   | Africa                | Nigeria              | Lower middle income |
| 1                   | Africa                | Algeria              | Upper middle income |
| 2                   | Africa                | South Africa         | Upper middle income |
| 1                   | Eastern Mediterranean | Syrian Arab Republic | Low income          |
| 1                   | Eastern Mediterranean | Pakistan             | Lower middle income |
| 1                   | Eastern Mediterranean | Palestine            | Lower middle income |
| 1                   | Eastern Mediterranean | Iran                 | Upper middle income |
| 5                   | South-East Asian      | India                | Lower middle income |
| 2                   | South-East Asian      | Sri Lanka            | Lower middle income |
| 1                   | South-East Asian      | Thailand             | Upper middle income |
| 2                   | European              | Kosovo               | Lower middle income |
| 1                   | European              | Turkey               | Upper middle income |
| 1                   | European              | Albania              | Upper middle income |
| 1                   | European              | Romania              | Upper middle income |
| 1                   | European              | Serbia               | Upper middle income |
| 4                   | Americas              | Mexico               | Upper middle income |
| 3                   | Americas              | Brazil               | Upper middle income |
| 2                   | Americas              | Argentina            | Upper middle income |
| 1                   | Americas              | Ecuador              | Upper middle income |

|   |          |                |                     |
|---|----------|----------------|---------------------|
| 3 | Americas | Colombia       | Upper middle income |
| 1 | Americas | Peru           | Upper middle income |
| 1 | Americas | Costa Rica     | Upper middle income |
| 1 | Americas | Guatemala City | Upper middle income |
